# Supplementary material
Source: PubMed Central journal article supplement (PMC7566698)
Supplement: mmc1.pdf [file mmc1.pdf]

# Supplemental Online Appendix to “Panel Forecasts of Country-Level Covid-19 Infections”

Laura Liu, Hyungsik Roger Moon, and Frank Schorfheide

## A Alternative Covid-19 Forecasts

Here we list URLs of Covid-19 forecasts mentioned in the introduction. The list is not meant to be exhaustive.

- Li and Linton (2020):  
<http://covid.econ.cam.ac.uk/linton-uk-covid-cases-predicted-peak/>
- The Center for Disease Control:  
<https://www.cdc.gov/coronavirus/2019-ncov/covid-data/forecasting-us.html>
- Nicholas Reich: <https://reichlab.io/covid19-forecast-hub/>
- Institute for Health Metrics and Evaluation: <http://covid19.healthdata.org/>
- Fernandez-Villaverde and Jones (2020):  
<https://web.stanford.edu/~chadj/Covid/Dashboard.html>
- Georgia State University School of Public Health:  
<https://publichealth.gsu.edu/research/coronavirus/>
- Youyang Gu: <https://covid19-projections.com/>
